# Supplementary material for: The synthesis and structural characterization of both diastereomers of 5′-(hydroxymethyl)-6,5′-cyclo-2′,5′-dideoxyuridine cyclonucleosides
Source: Royal Society of Chemistry journal article supplement (doi:10.1039/c4ra04784b), 2014-07-01

## Electronic Supporting Information

### **The synthesis and structural characterization of both diastereomers of 5'-(hydroxymethyl)-6,5'-cyclo-2',5'-dideoxyuridine cyclonucleosides**

*Hongchuan Yu, Mark K. Schlegel, and Larry W. McLaughlin\**

Department of Chemistry, Merkert Chemistry Center, Boston College,  
2609 Beacon Street, Chestnut Hill, MA 02467-3801

\*E-mail: larry.mclaughlin@bc.edu

#### Table of Contents:

- 1) Crystal structures of **1S**, **3R**, **3S**, and **5S**
- 2) <sup>1</sup>H, <sup>13</sup>C, and <sup>31</sup>P NMR spectra

### 1) Crystal structures of 1S, 3R, 3S, and 5S

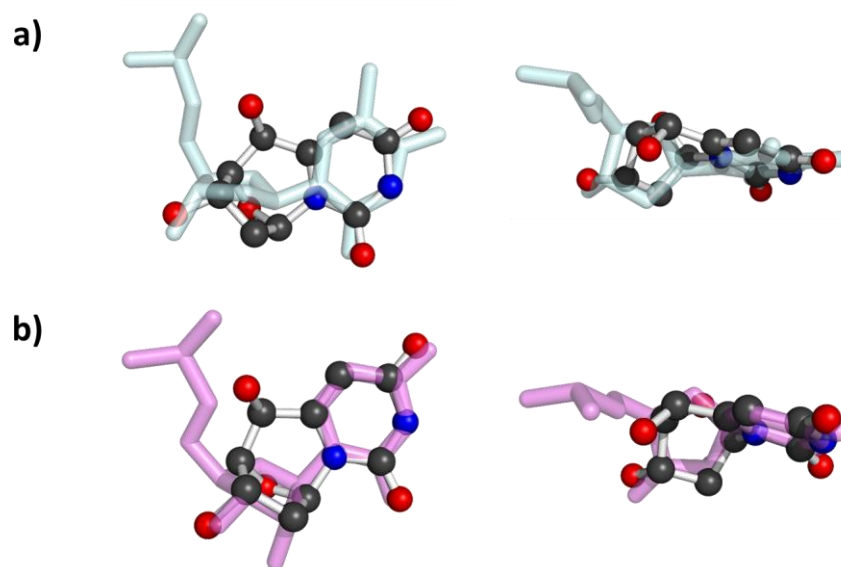

**Figure S1.** Side and top view of **1S** (ball and stick) overlaid with a) a dT<sup>1</sup> nucleotide; and b) a U<sup>2</sup> nucleotide. Figures generated using PyMol.

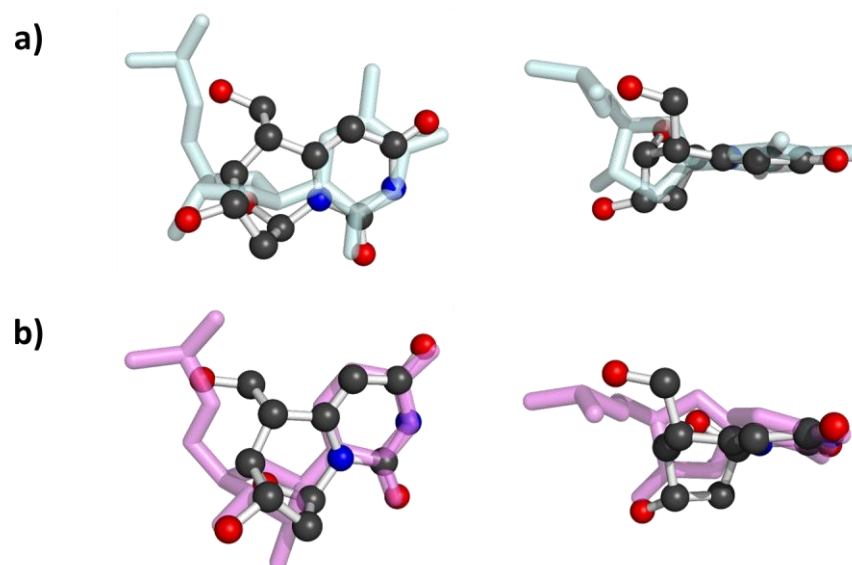

**Figure S2.** Side and top view of **3S** (ball and stick) overlaid with a) a dT<sup>1</sup> nucleotide; and b) a U<sup>2</sup> nucleotide. Figures generated using PyMol.

$^1\text{H}$  NMR of compound **8** (400 MHz,  $\text{CDCl}_3$ )

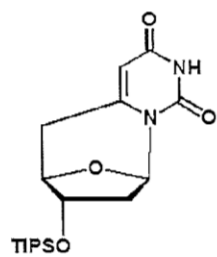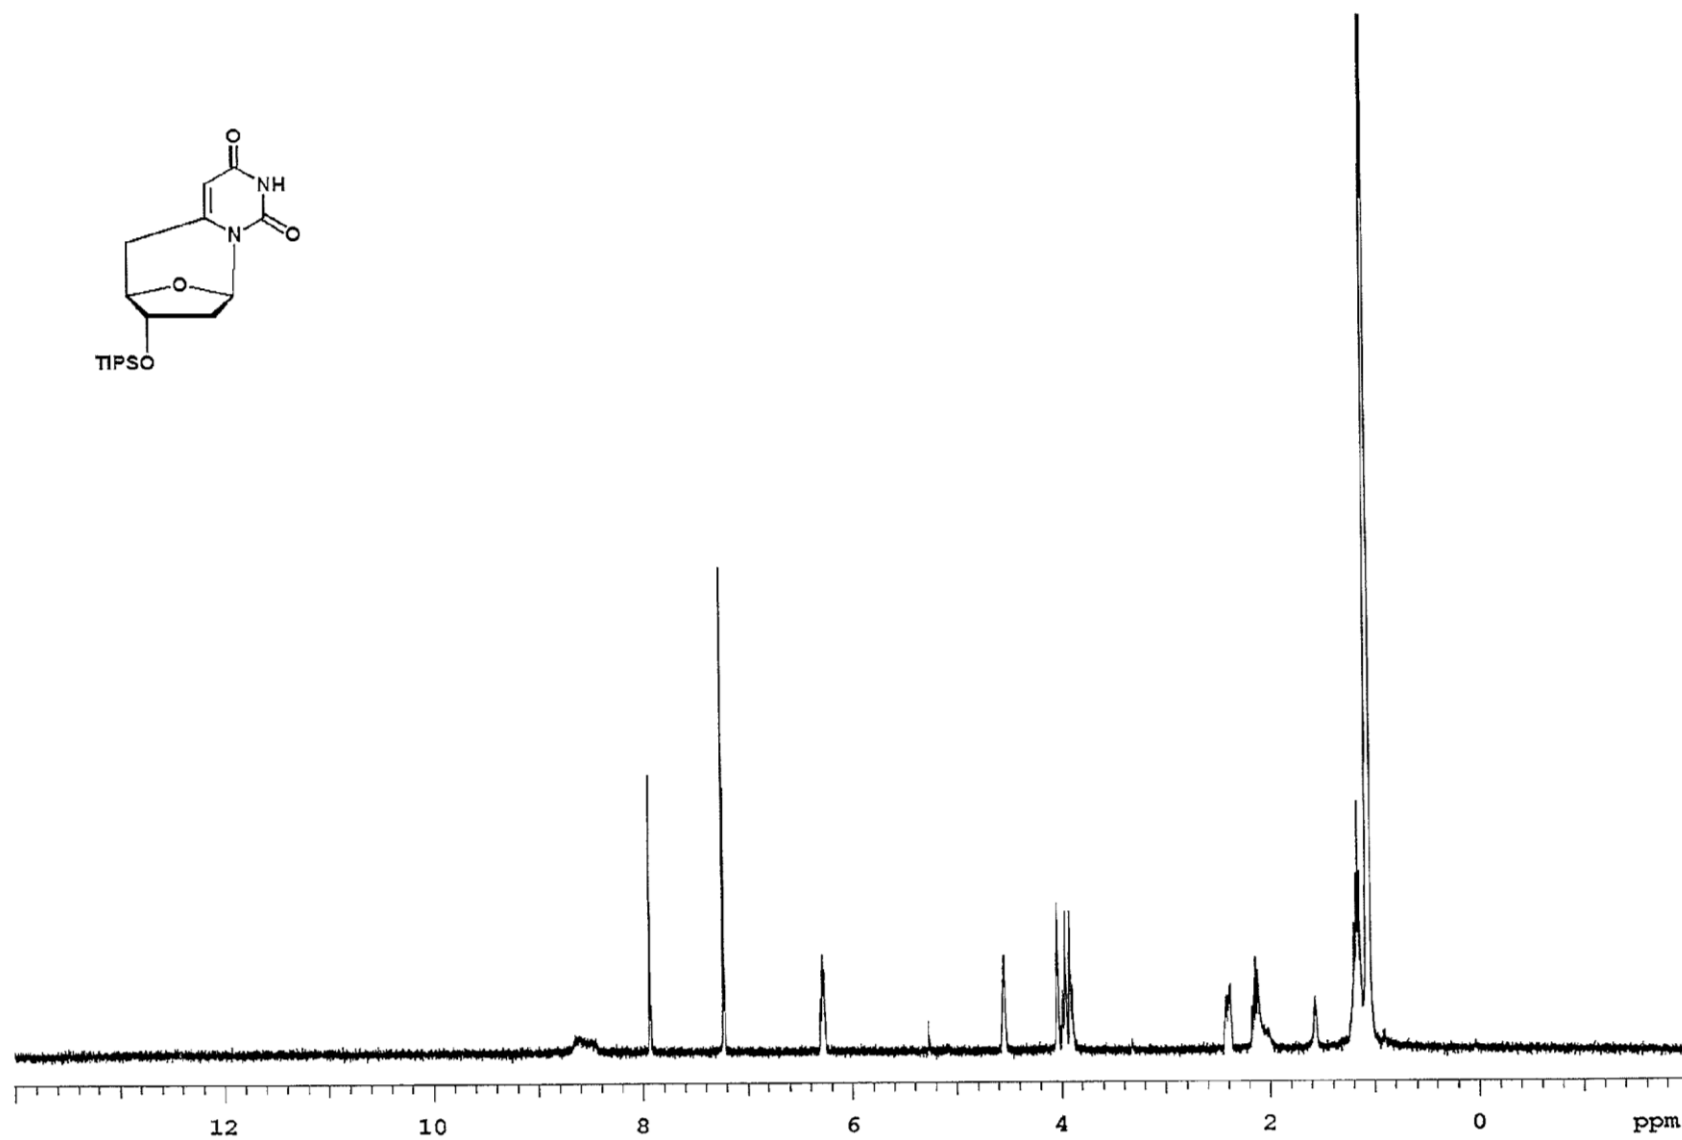

$^{13}\text{C}$  NMR of compound **8** (100 MHz,  $\text{CDCl}_3$ )

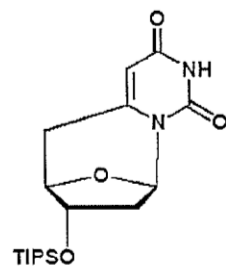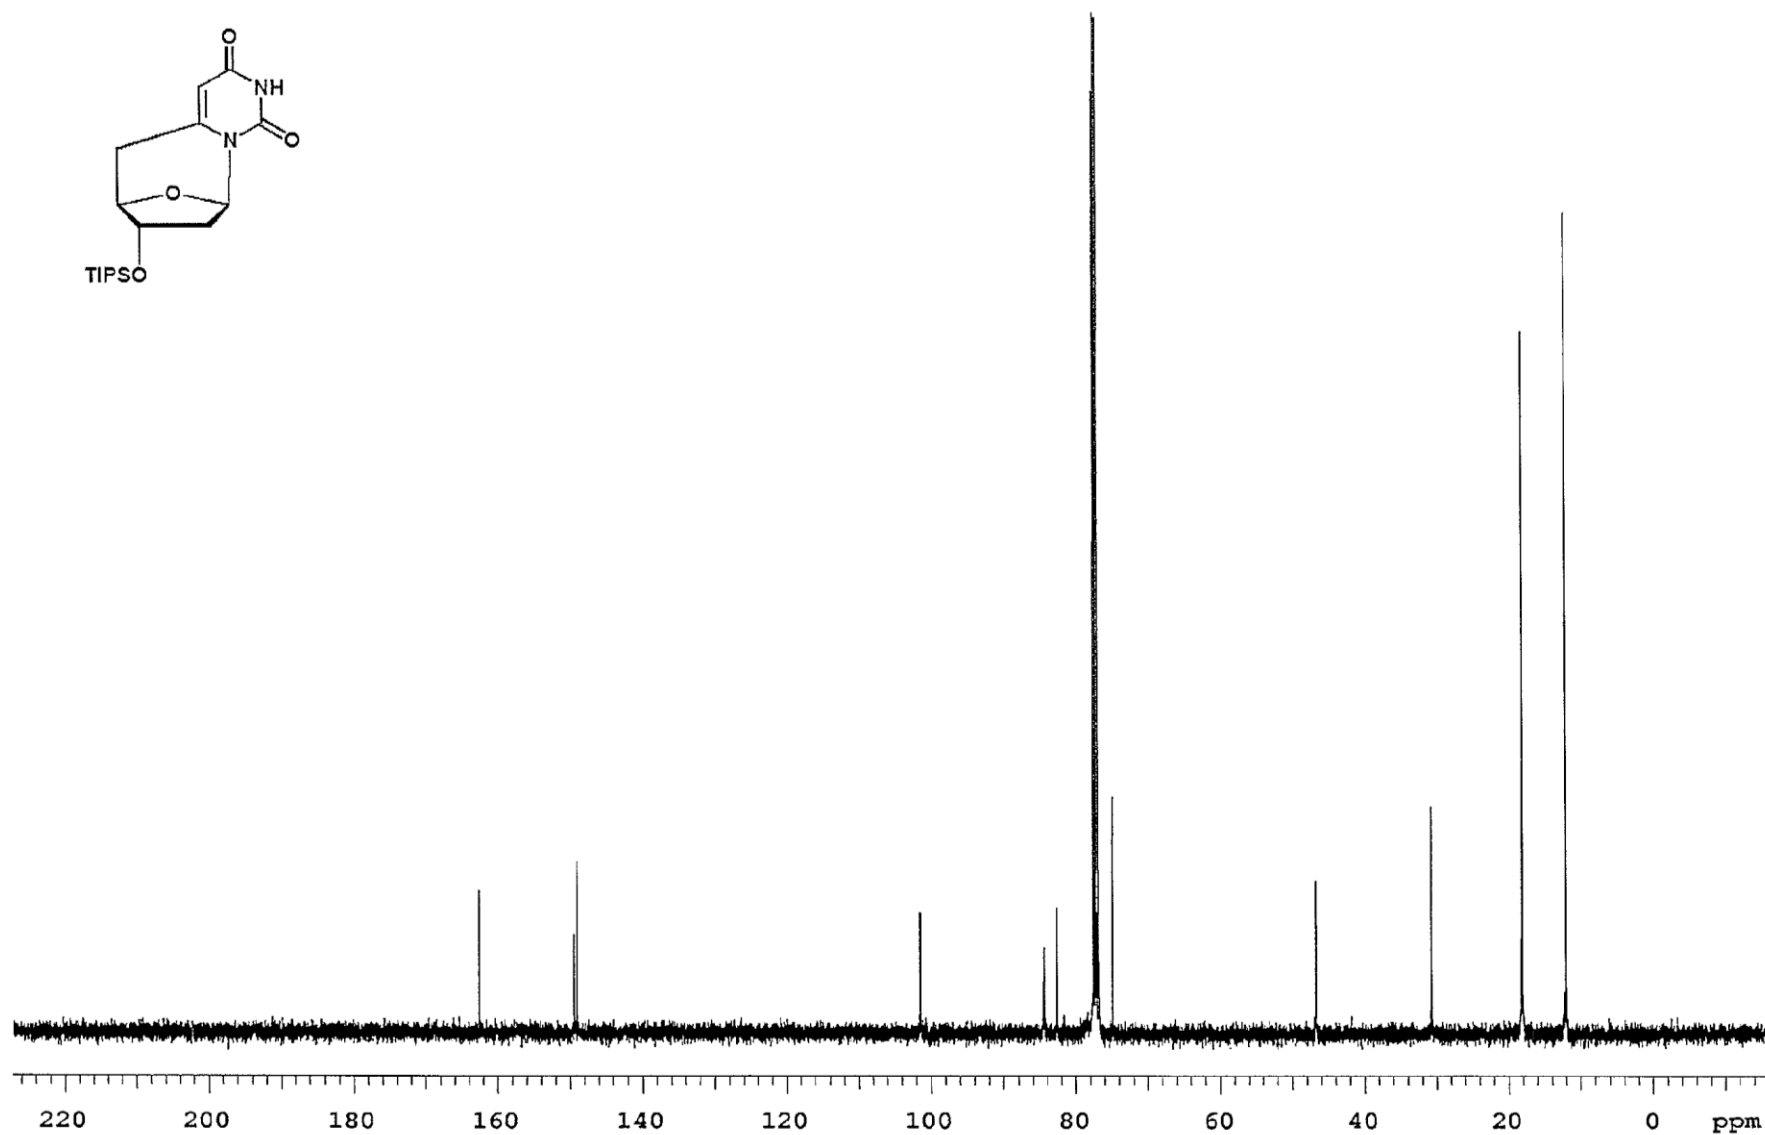

$^1\text{H}$  NMR of compound **9** (400 MHz,  $\text{CDCl}_3$ )

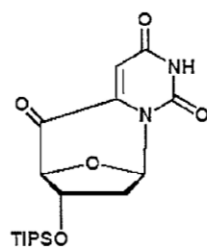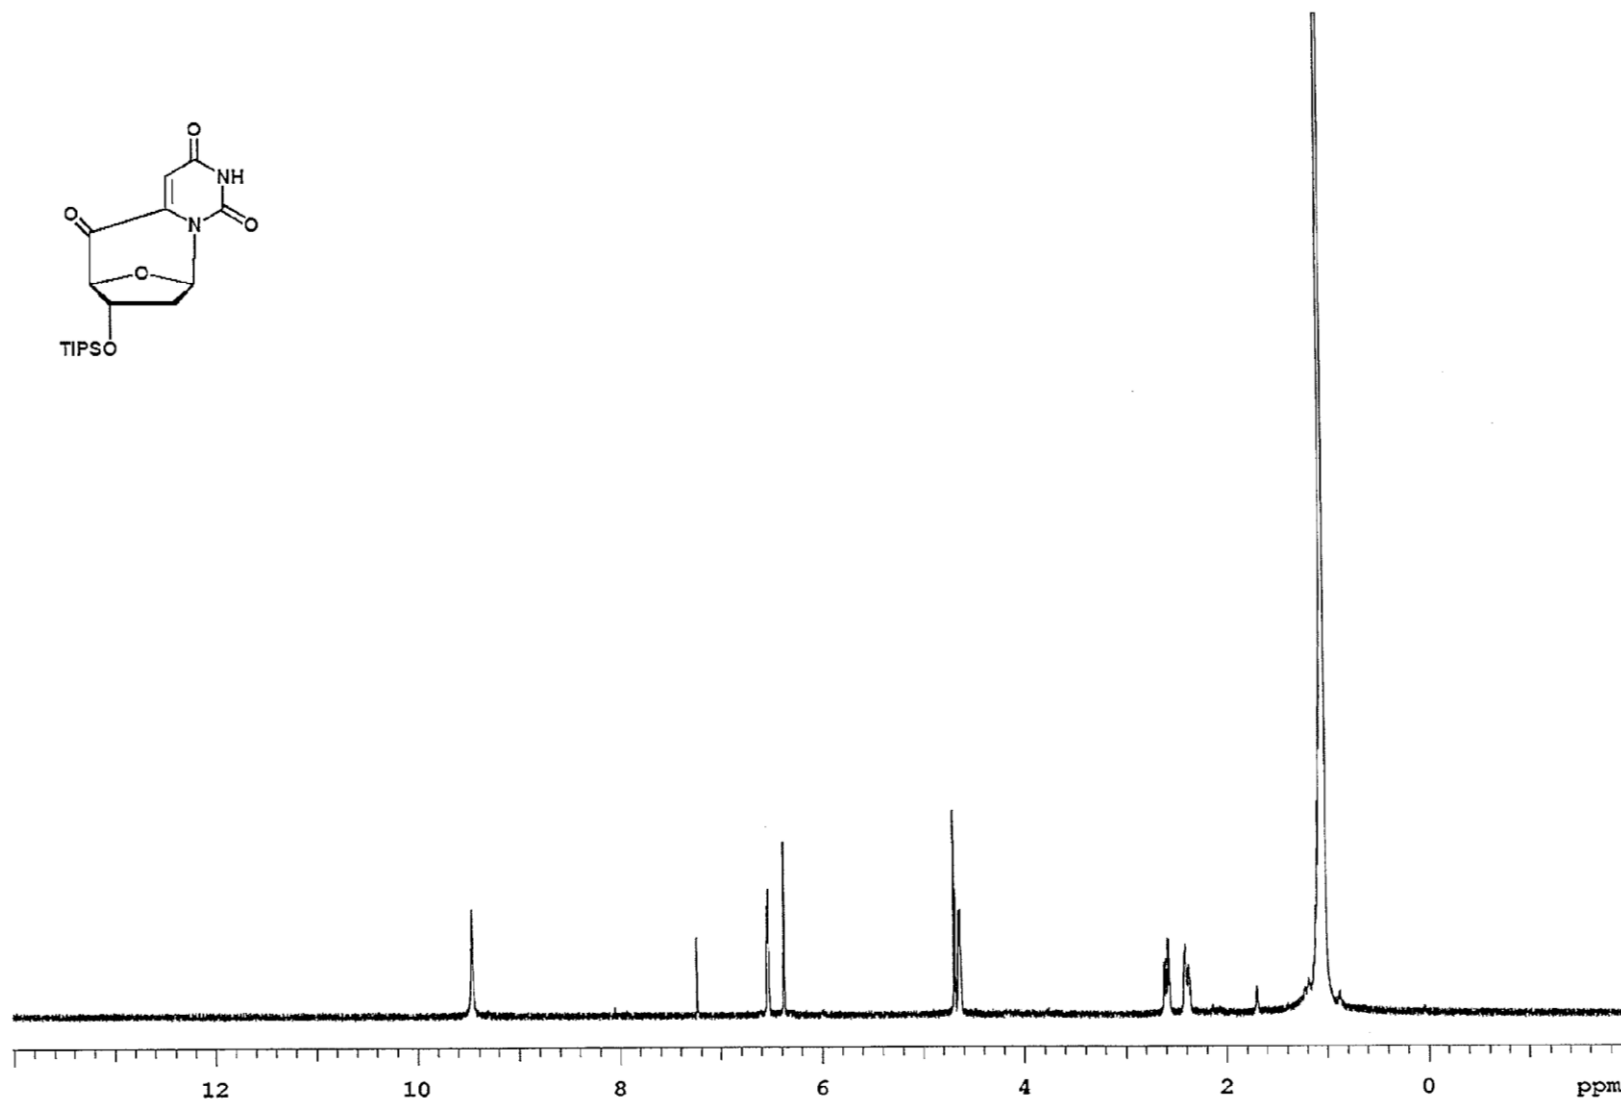

$^{13}\text{C}$  NMR of compound **9** (100 MHz,  $\text{CDCl}_3$ )

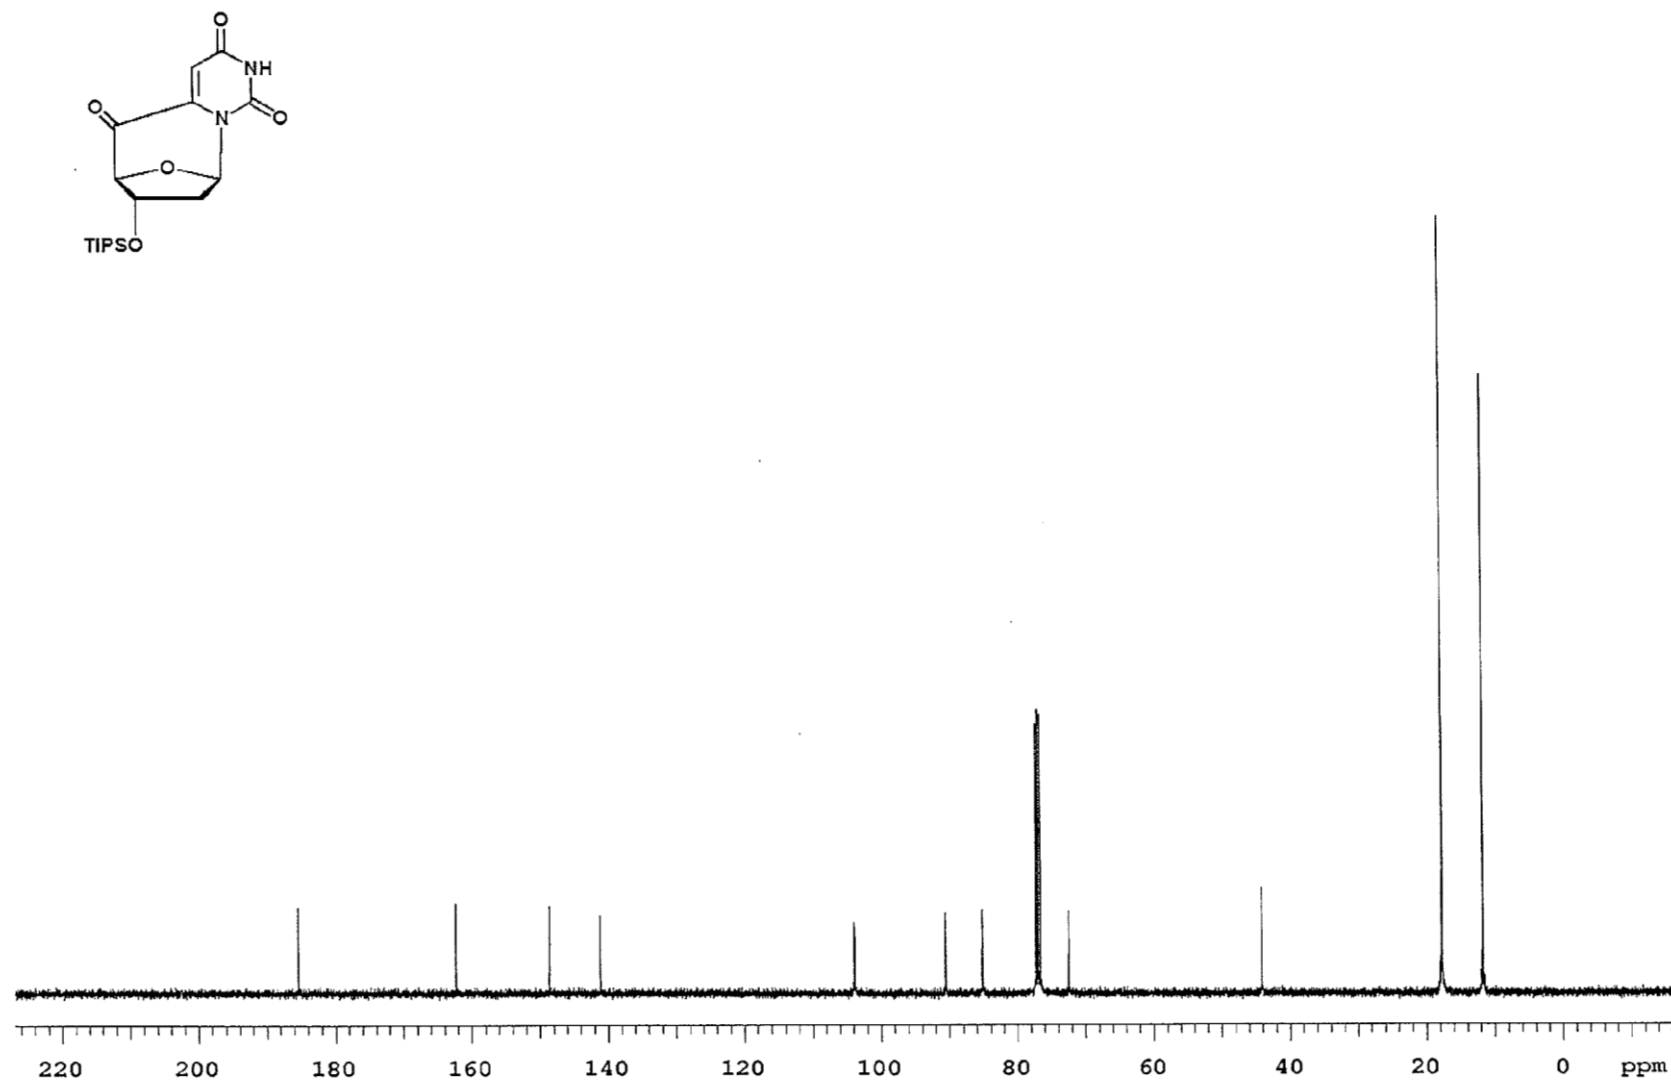

$^1\text{H}$  NMR of compound **10** (400 MHz,  $\text{CDCl}_3$ )

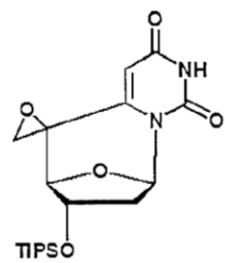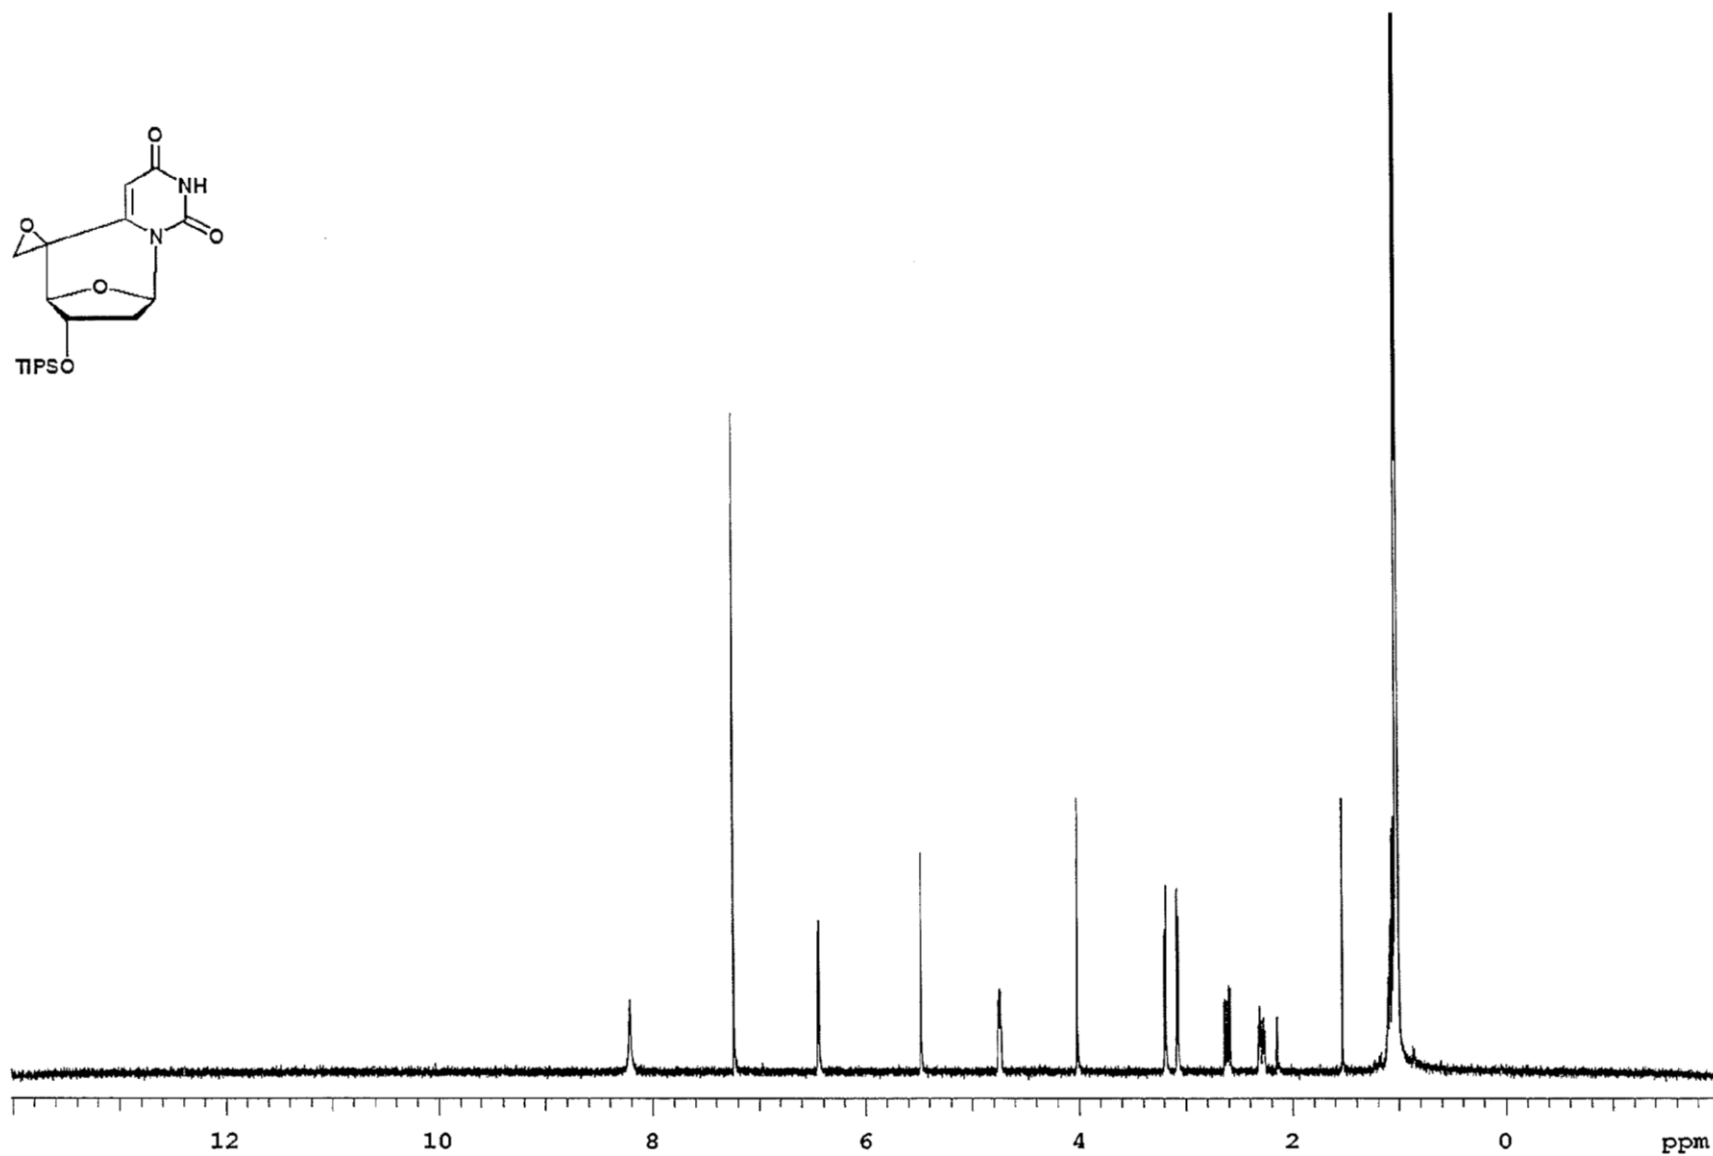

$^{13}\text{C}$  NMR of compound **10** (100 MHz,  $\text{CDCl}_3$ )

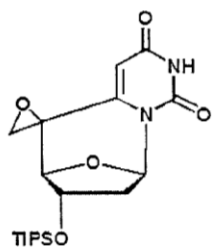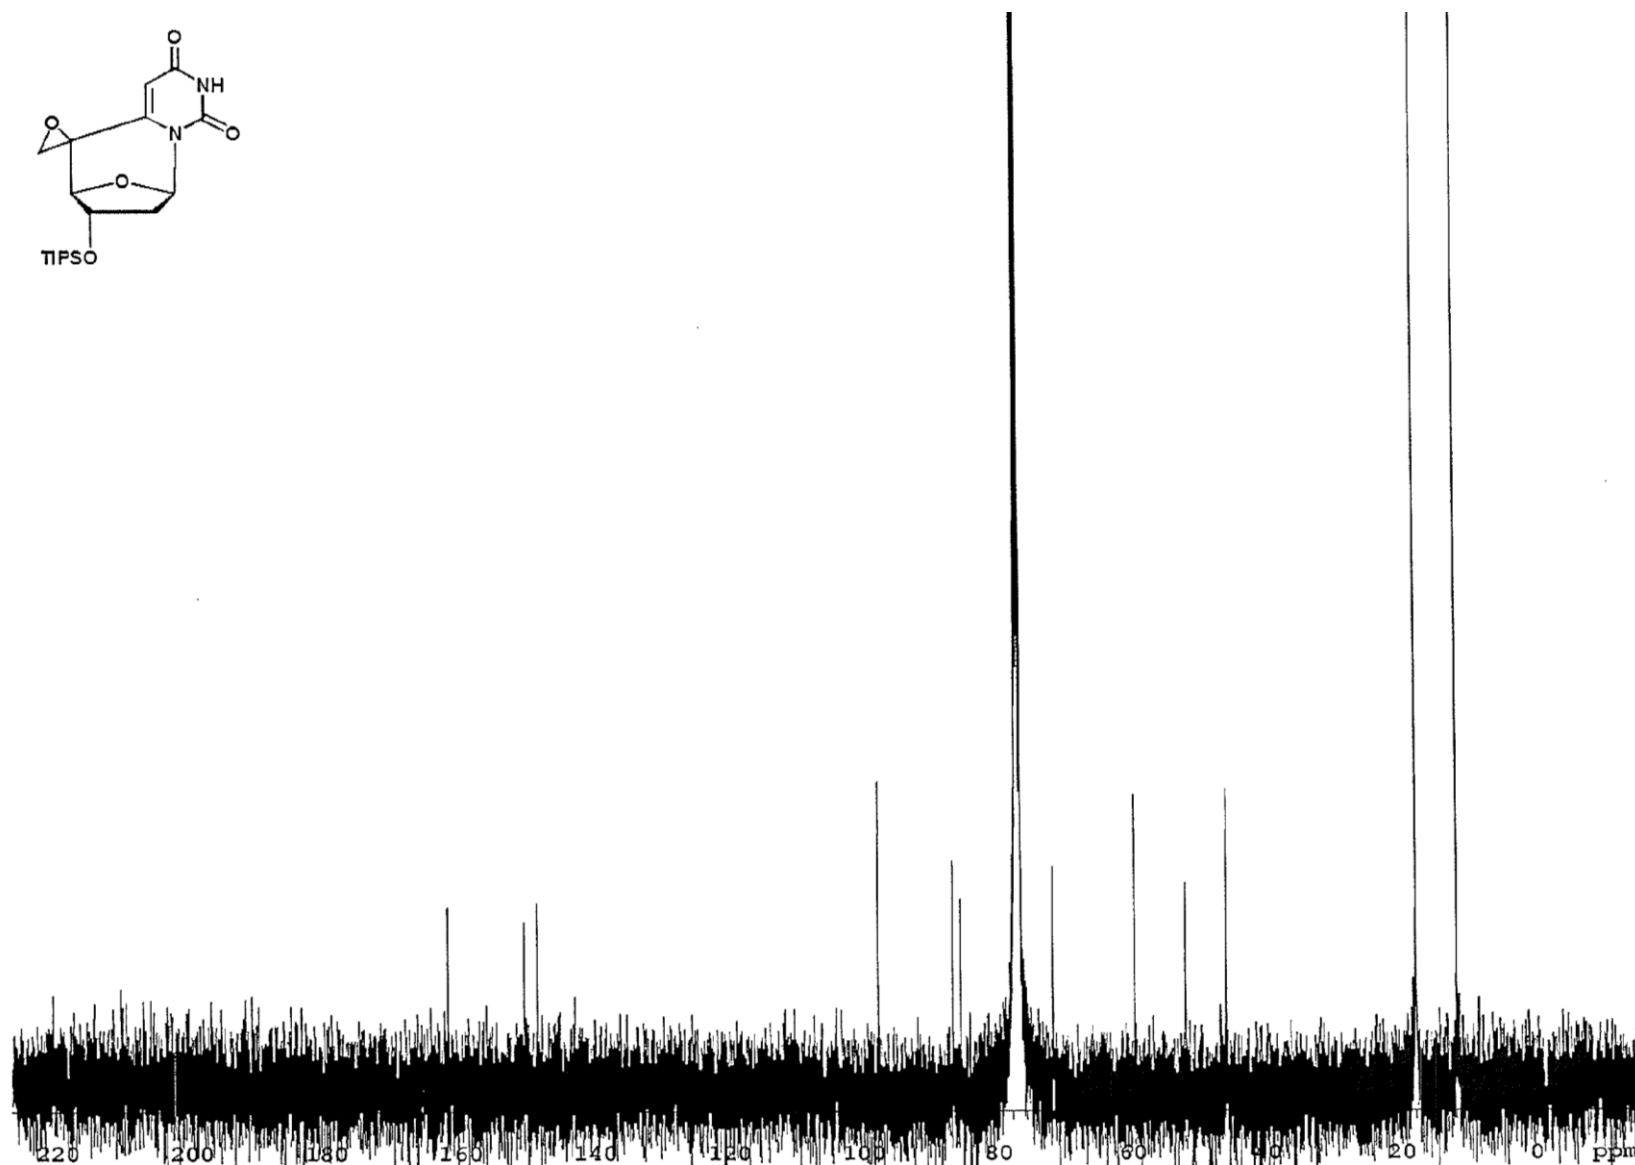



$^1\text{H}$  NMR of compound **11R** (400 MHz,  $\text{CDCl}_3$ )

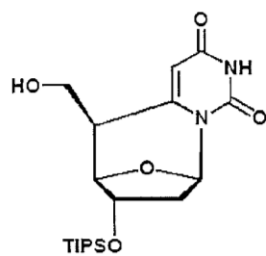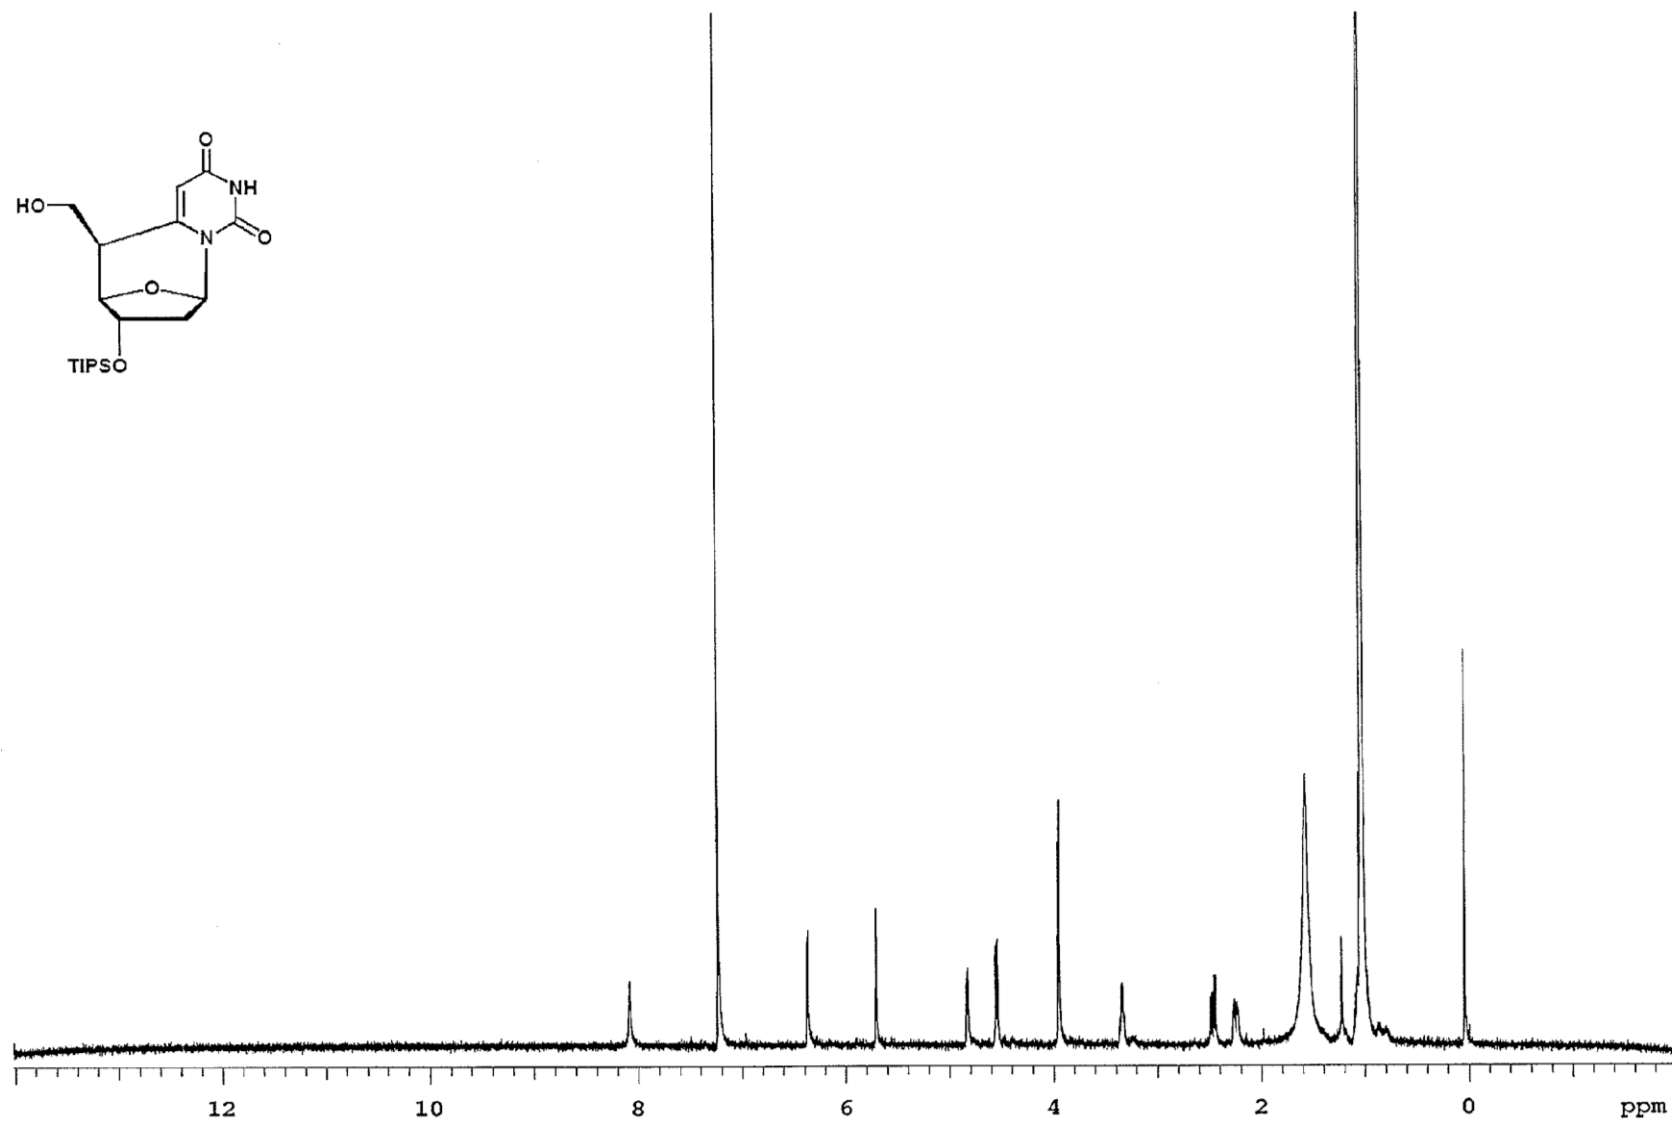

$^{13}\text{C}$  NMR of compound **11R** (100 MHz,  $\text{CDCl}_3$ )

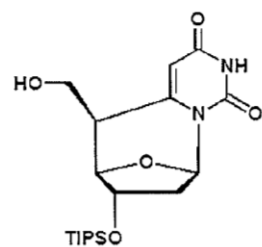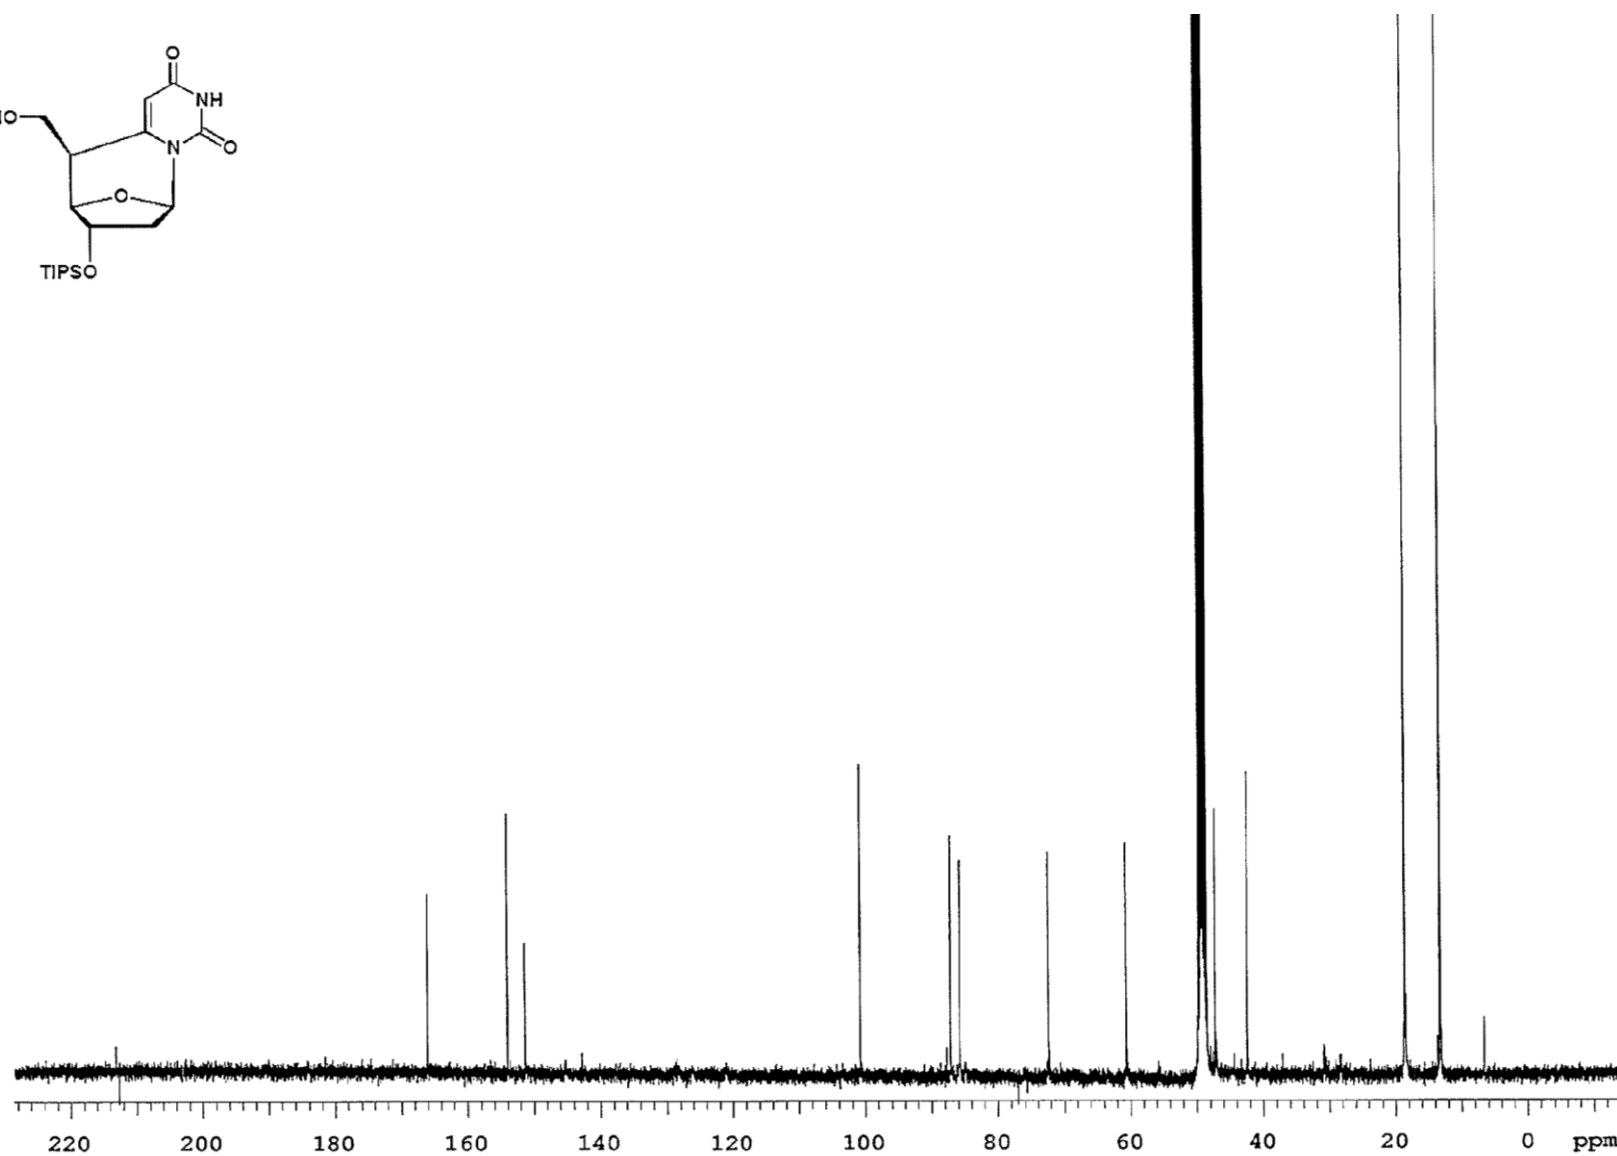

$^1\text{H}$  NMR of compound **11S** (400 MHz,  $\text{CDCl}_3$ )

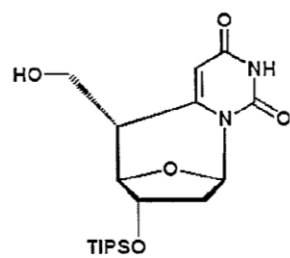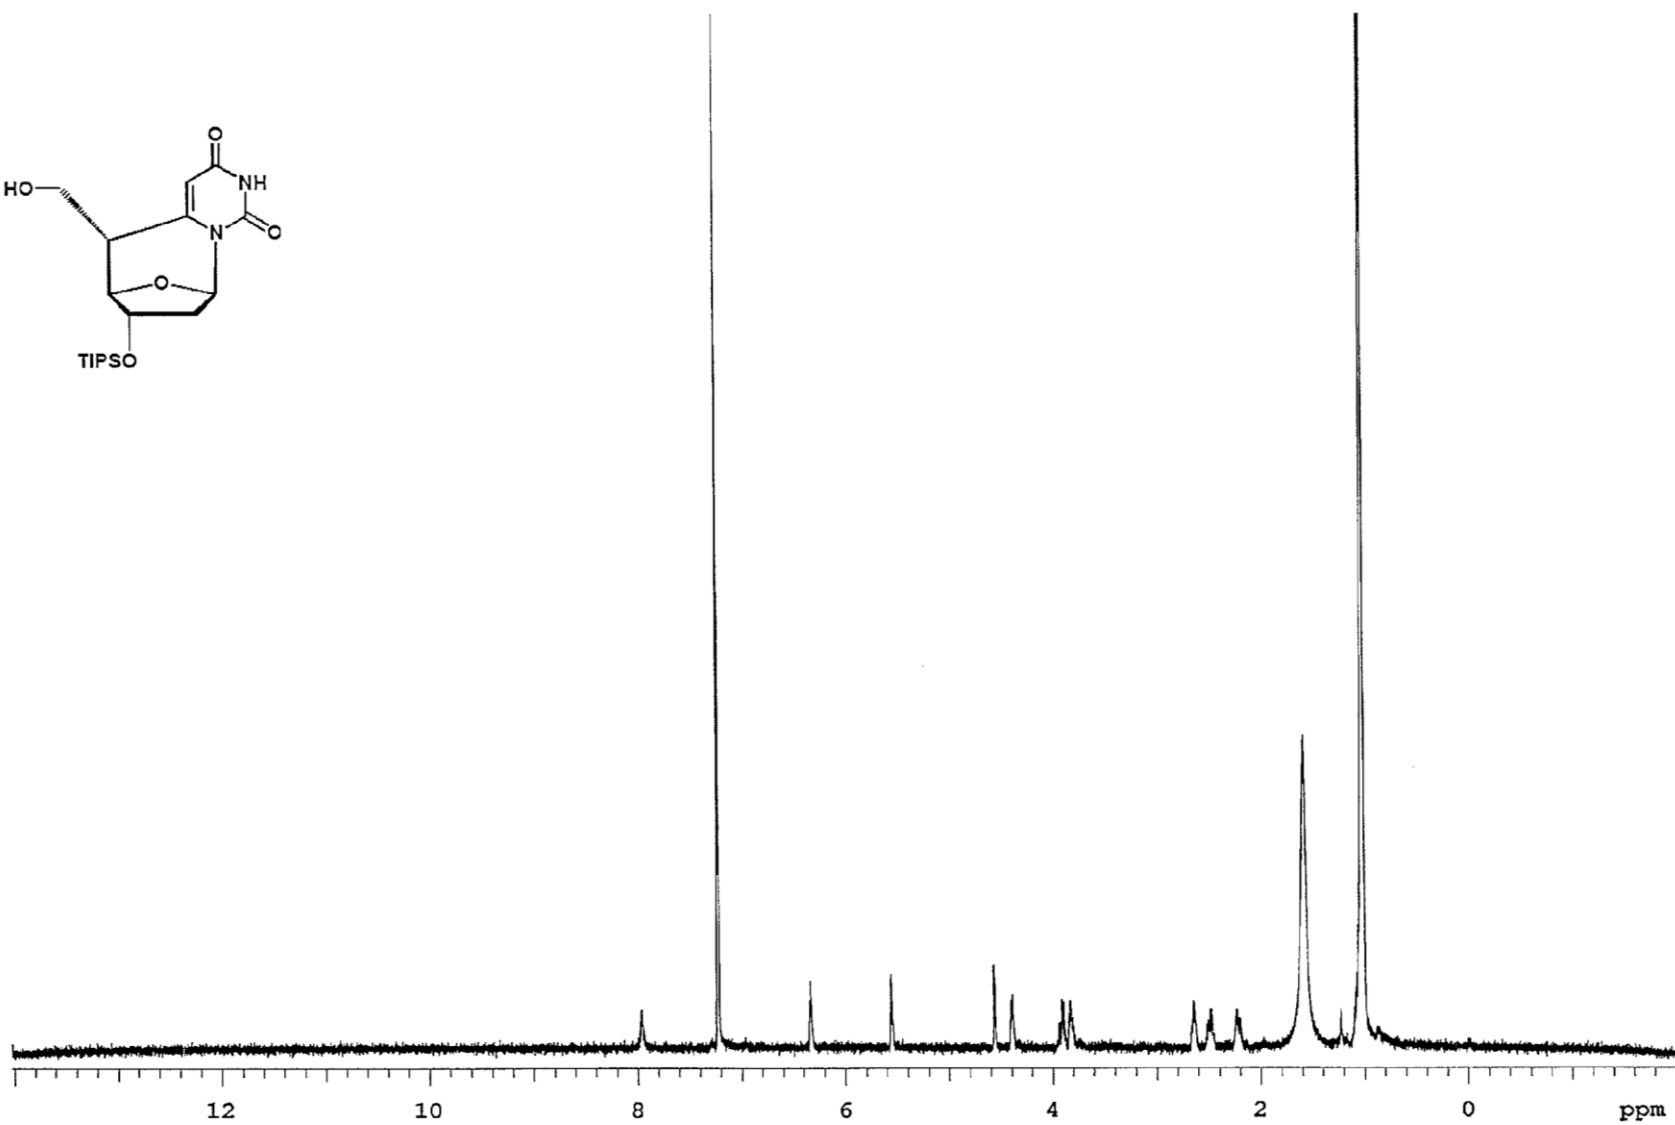

$^{13}\text{C}$  NMR of compound **11S** (100 MHz,  $\text{CDCl}_3$ )

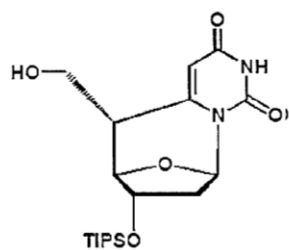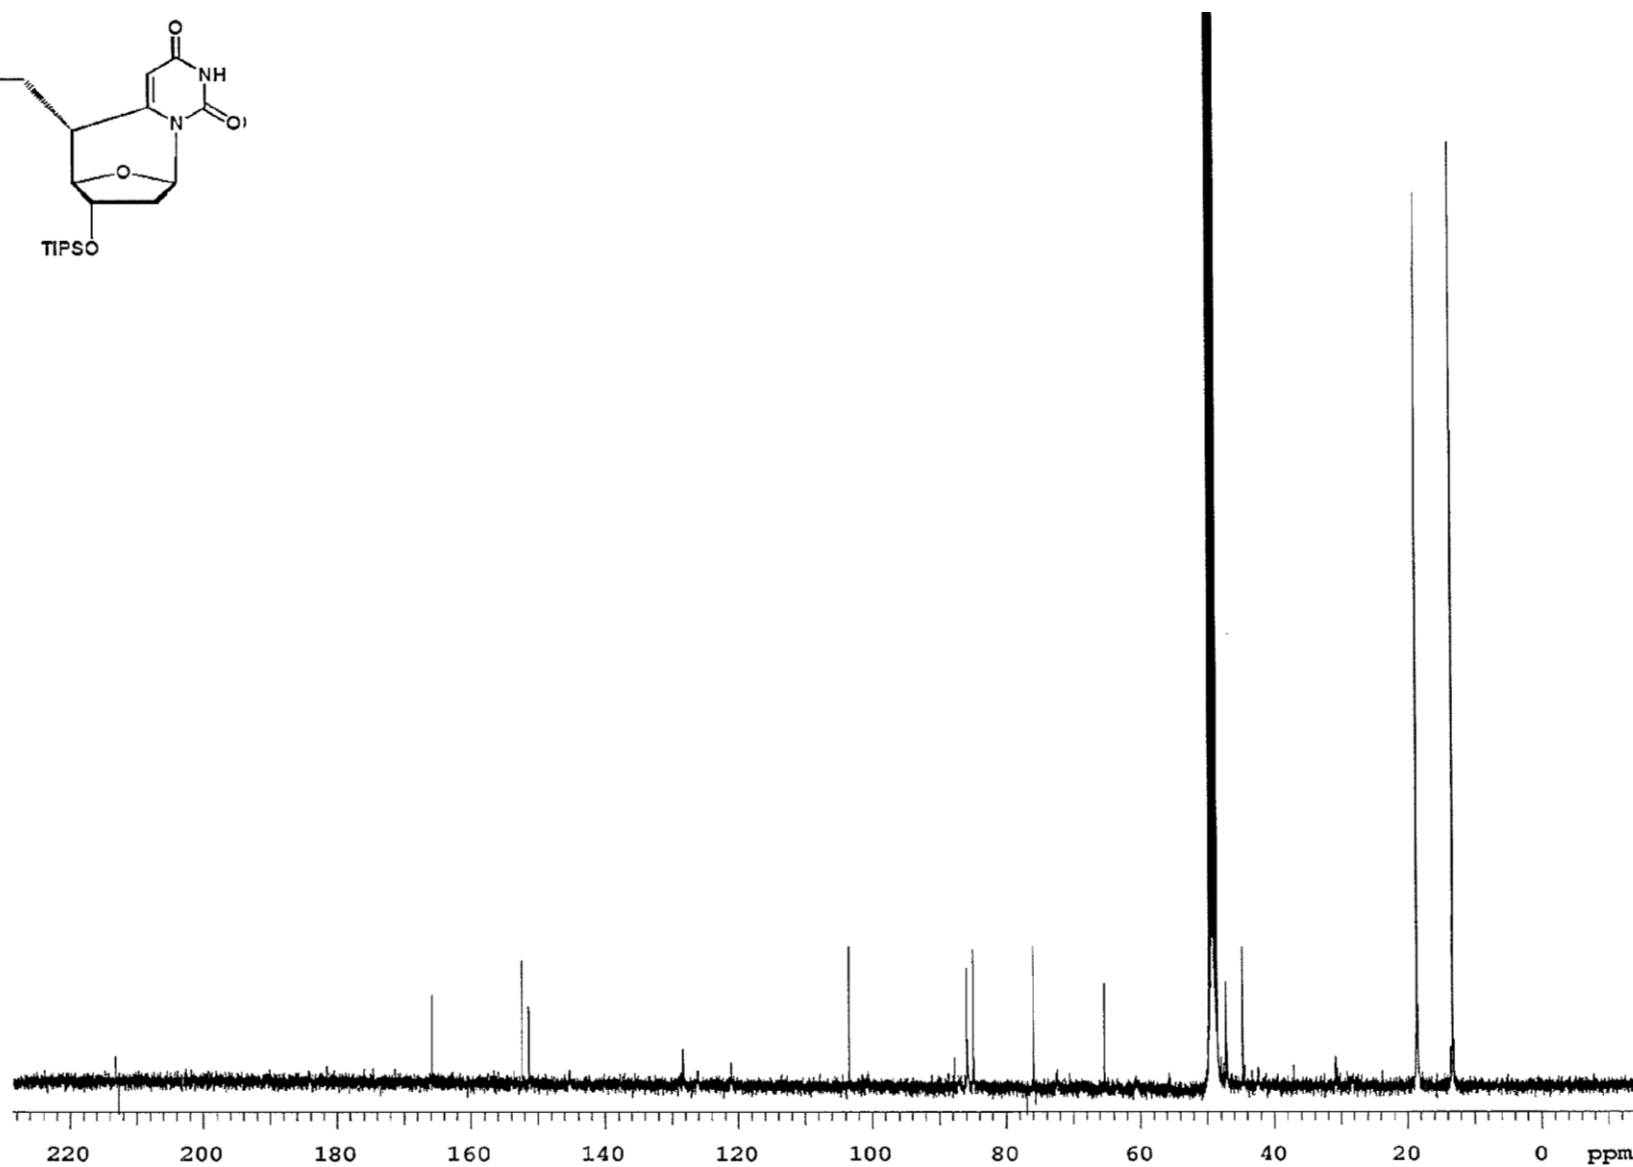

$^1\text{H}$  NMR of compound **3R** (400 MHz,  $d_6$ -DMSO)

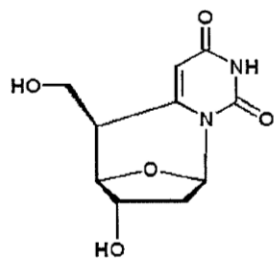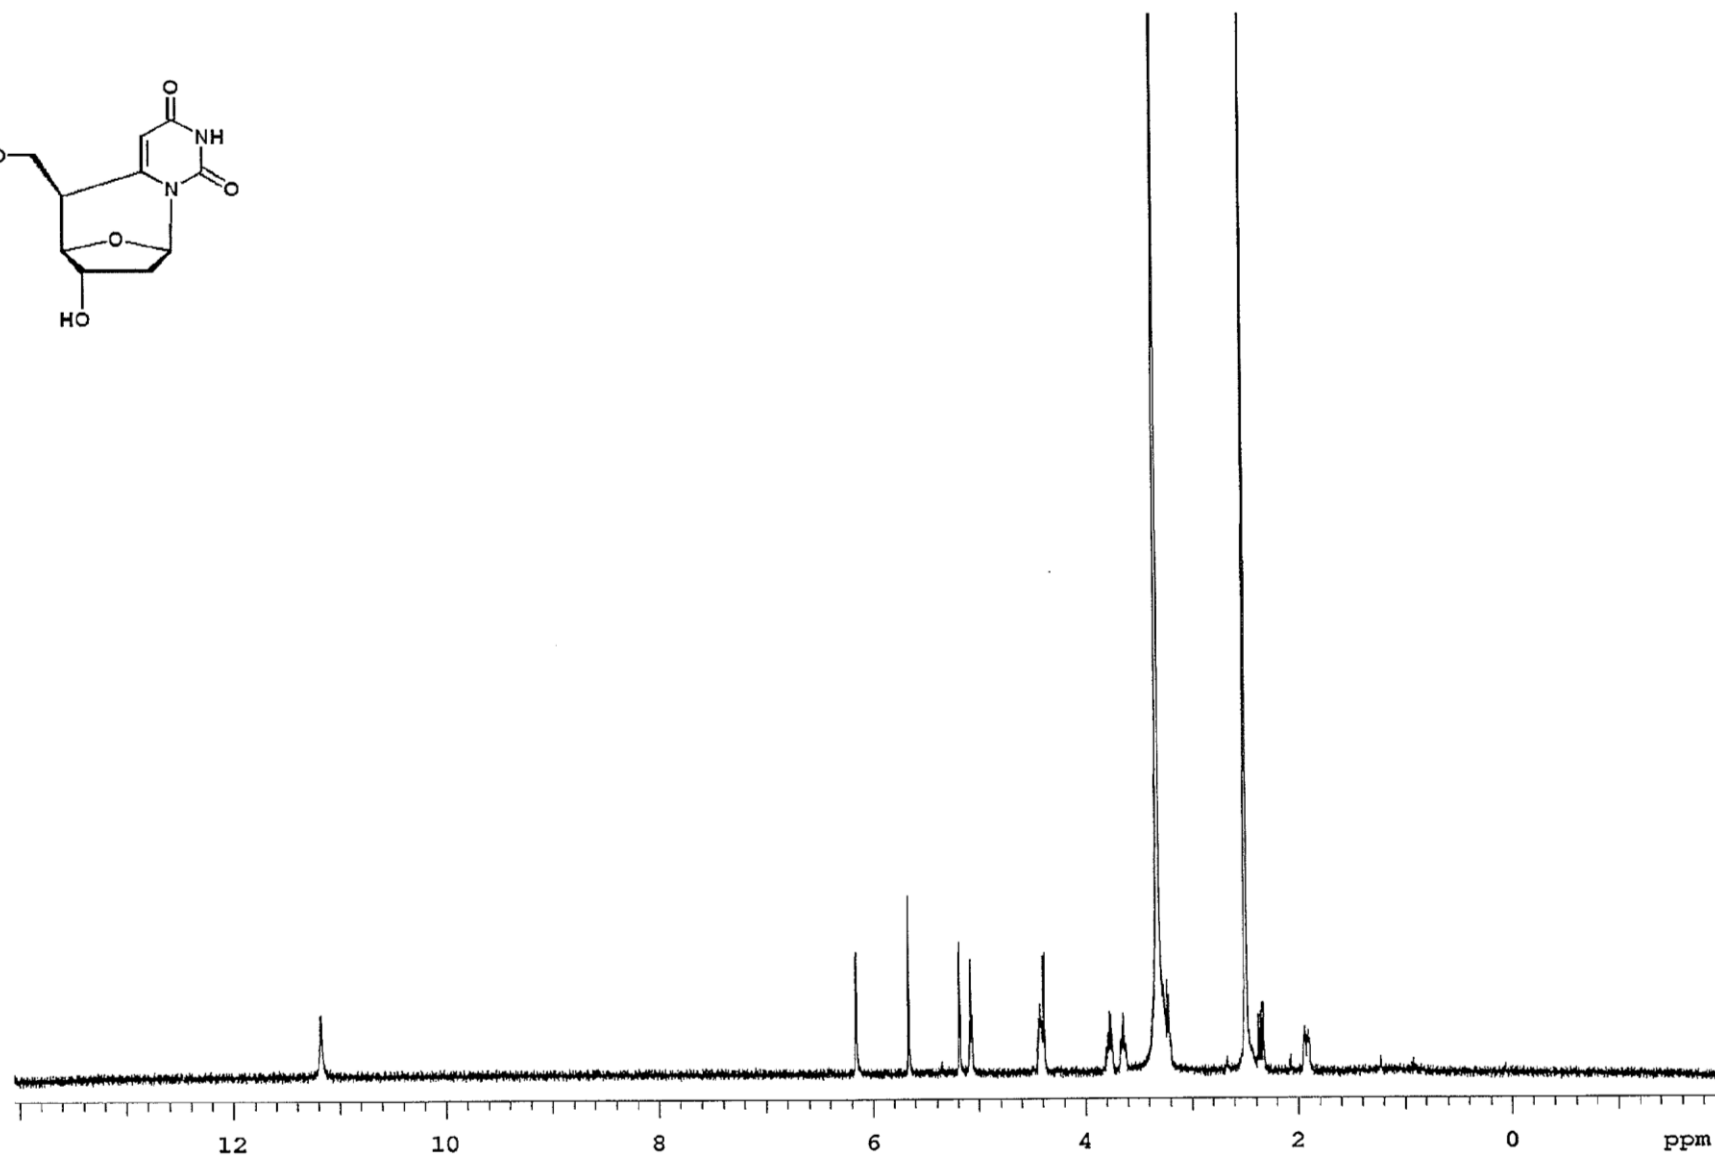

$^{13}\text{C}$  NMR of compound **3R** (100 MHz,  $d_6$ -DMSO)

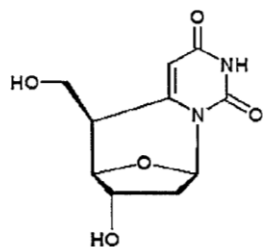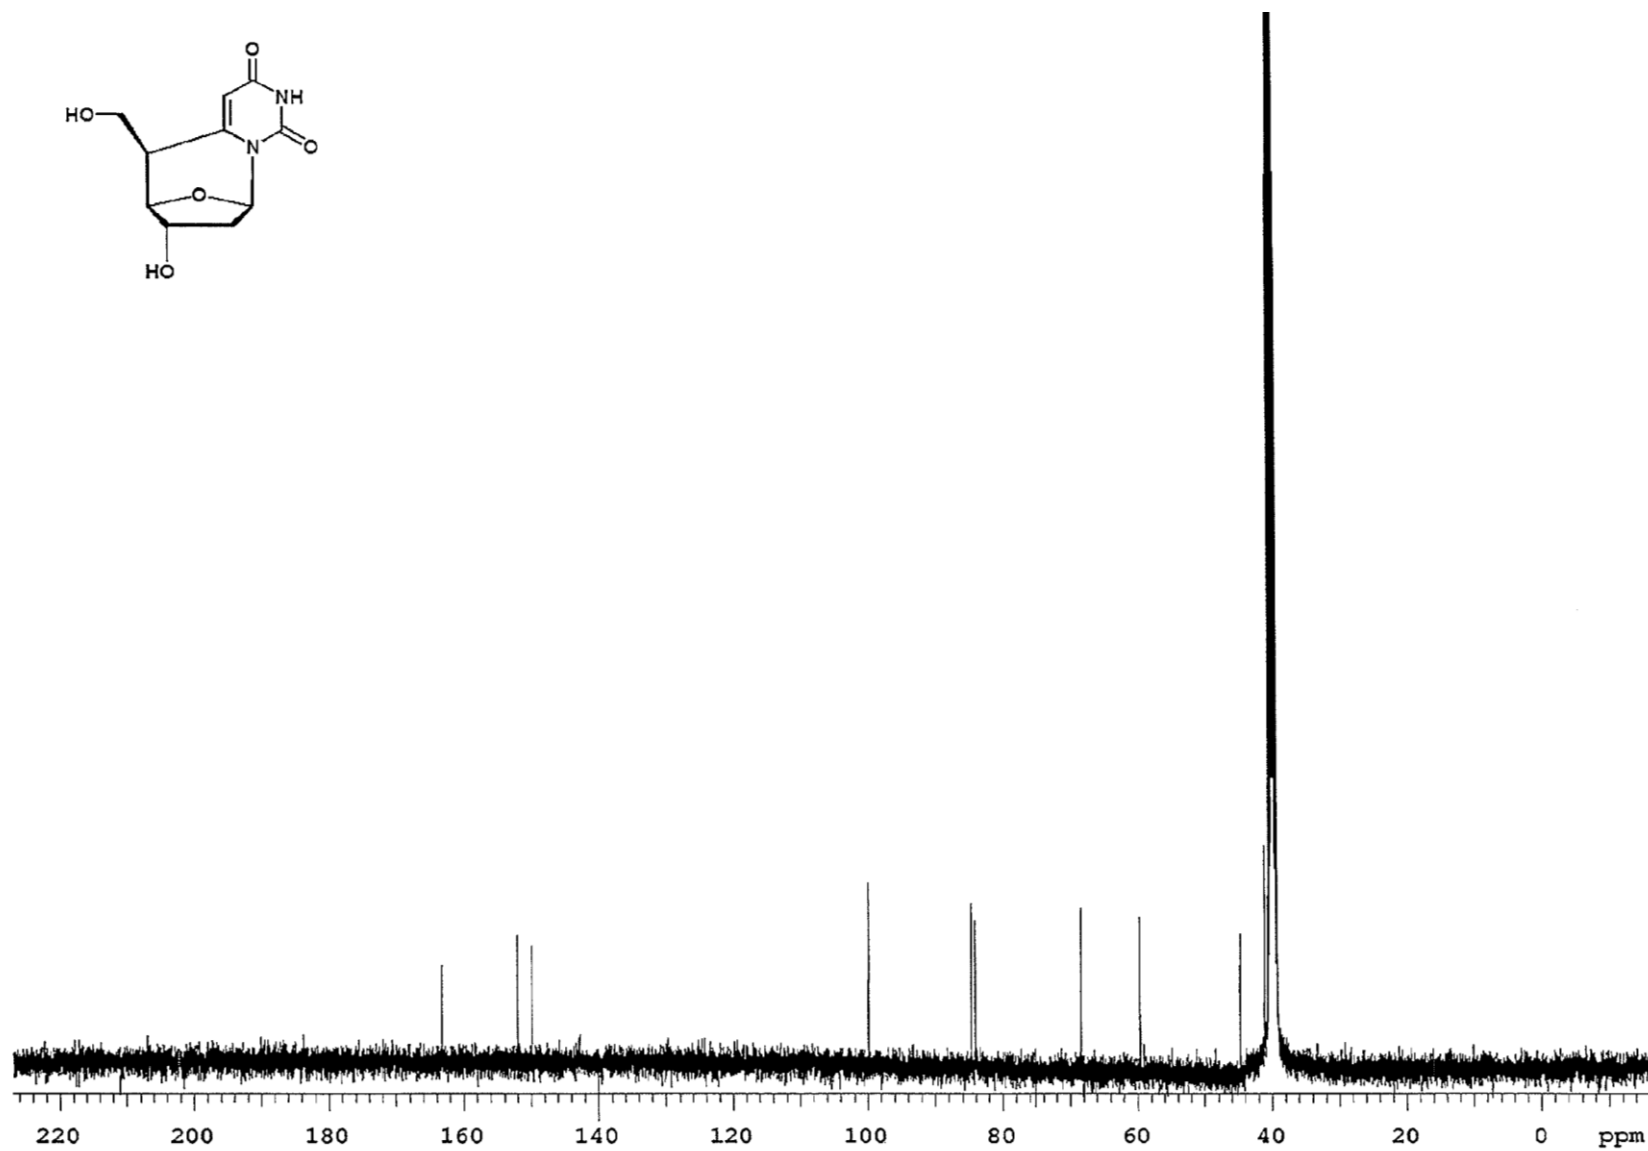

$^1\text{H}$  NMR of compound **3S** (500 MHz,  $d_6$ -DMSO)

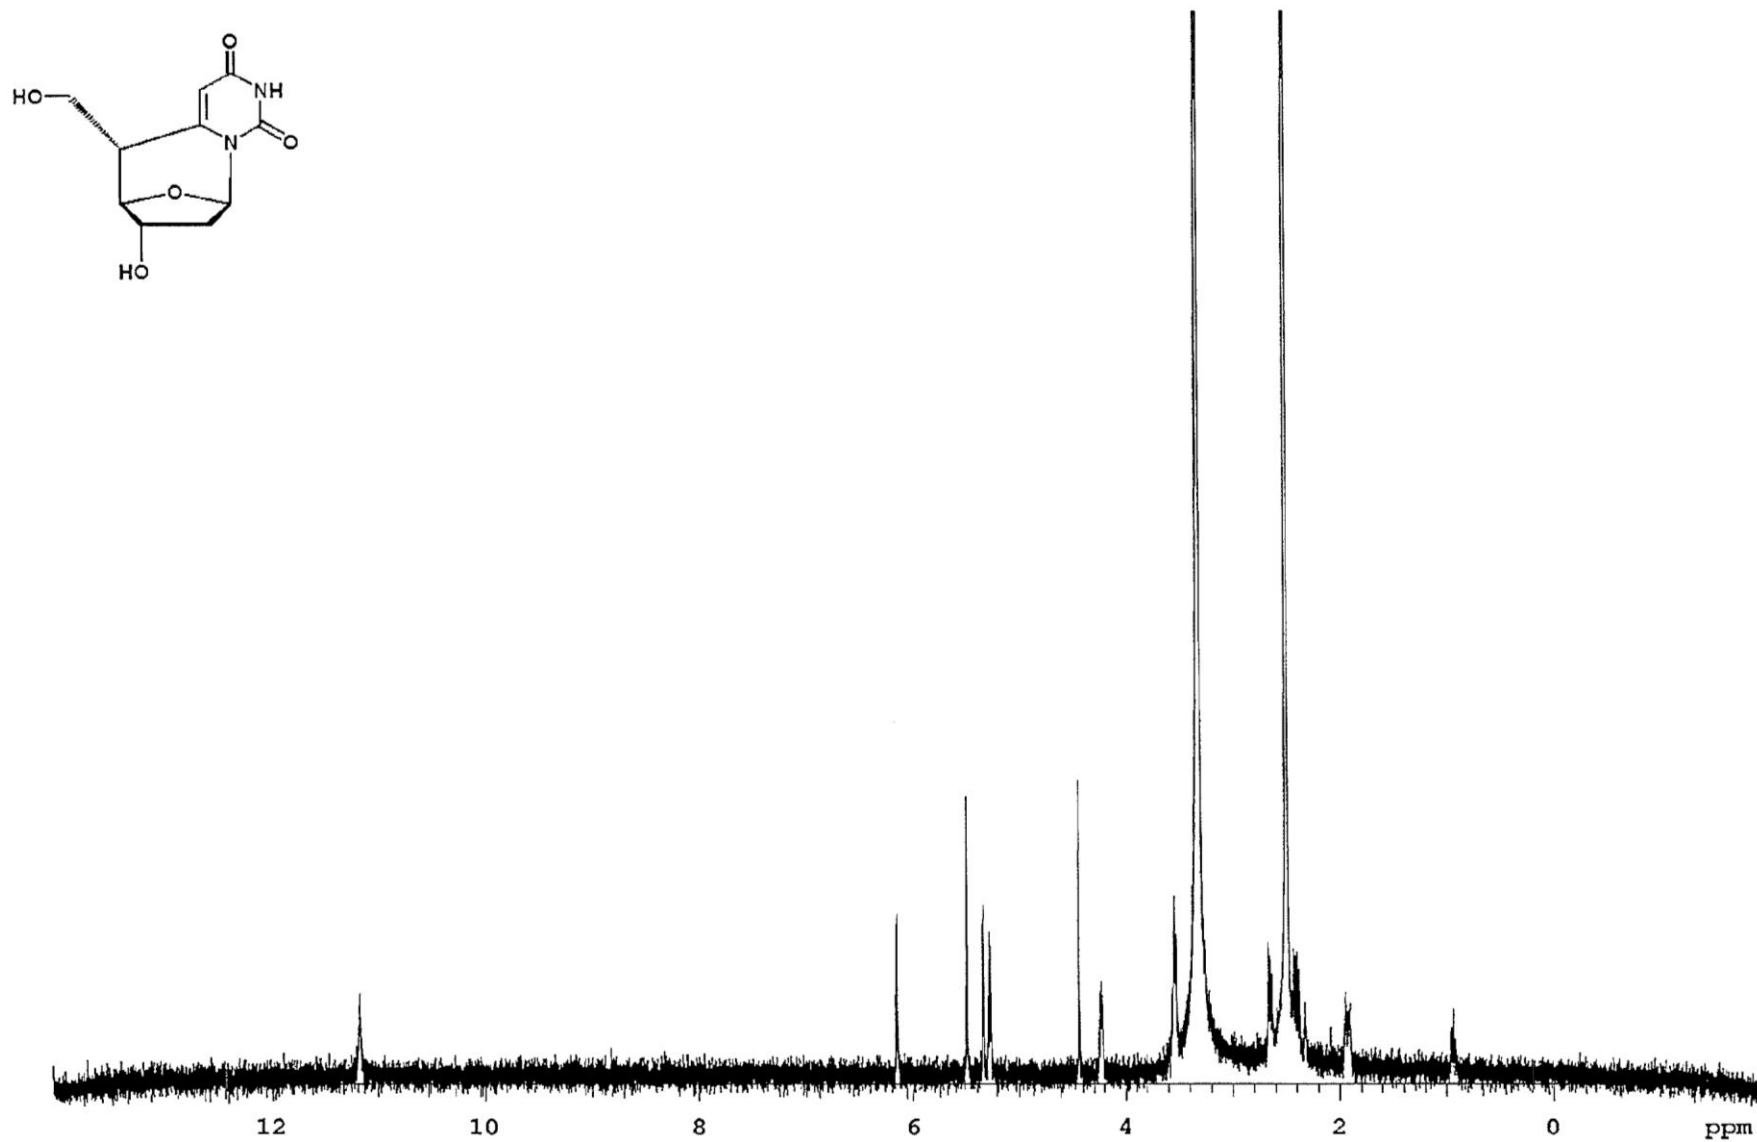

$^{13}\text{C}$  NMR of compound **3S** (100 MHz,  $d_6$ -DMSO)

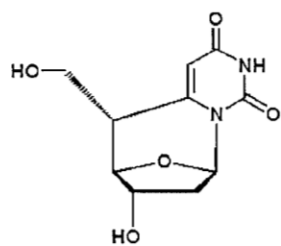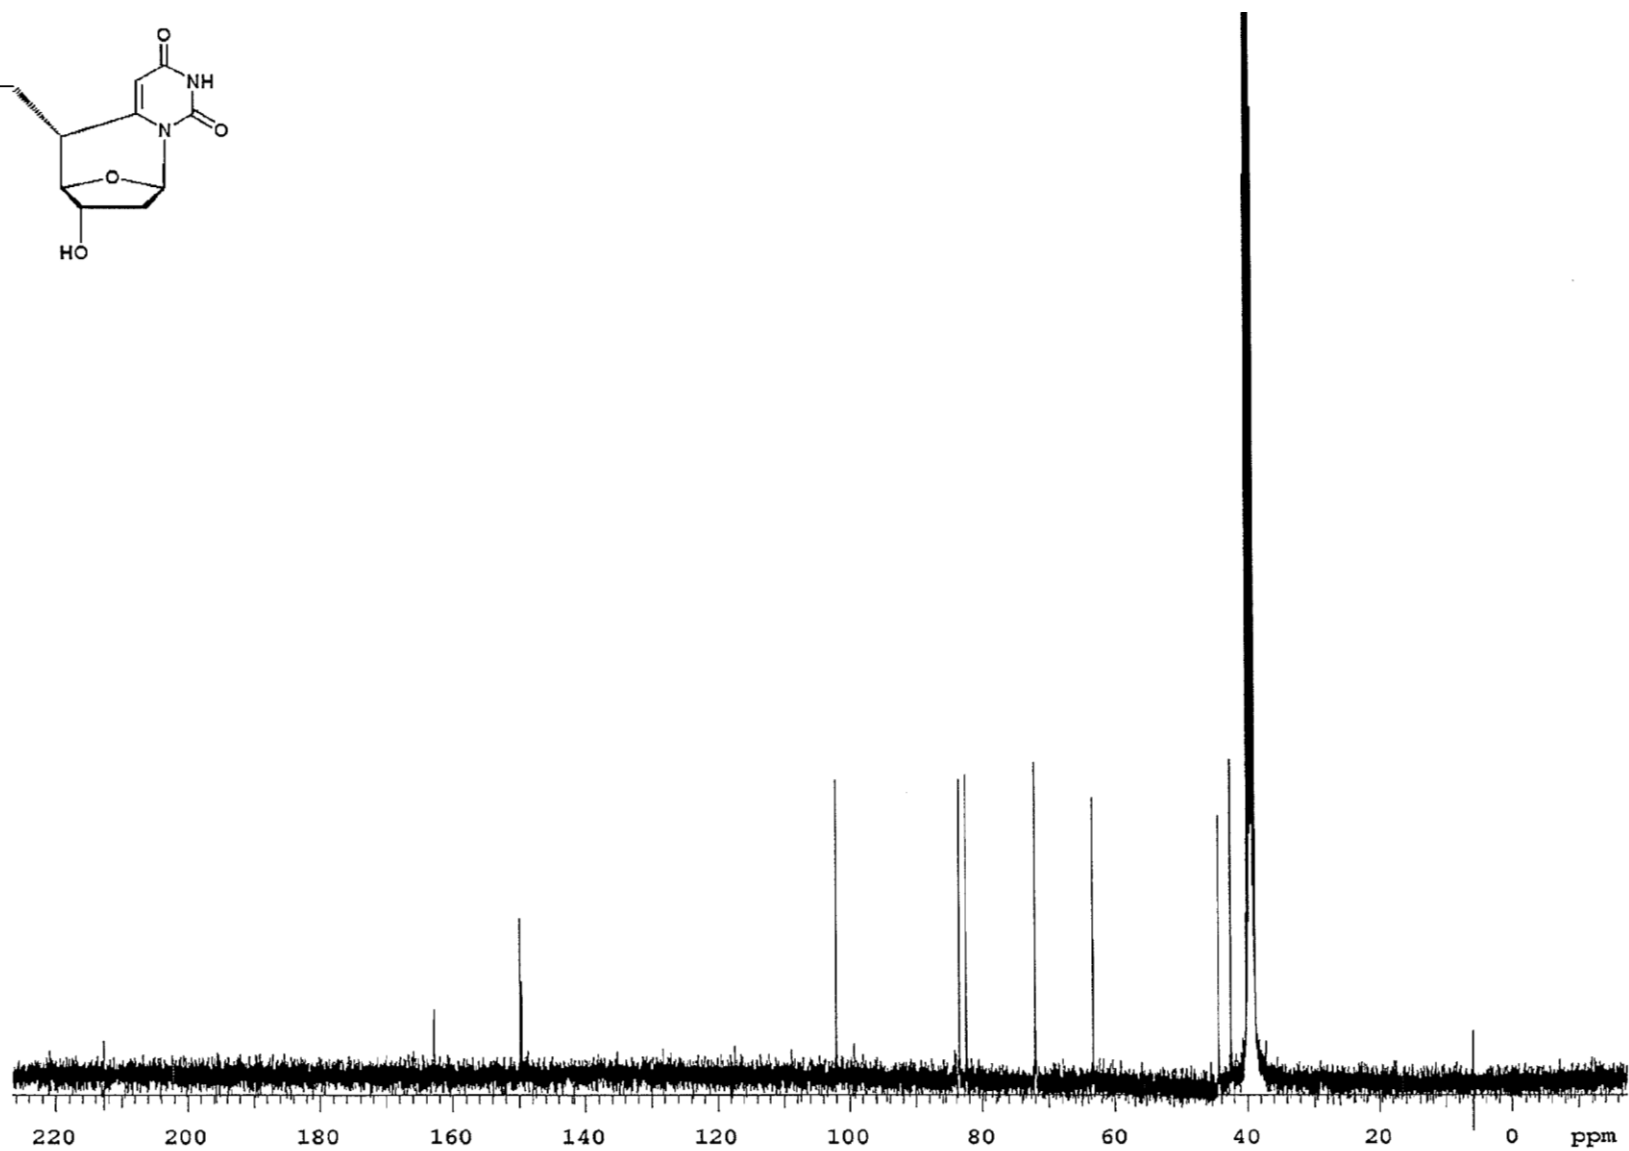



$^1\text{H}$  NMR of compound **12R** (400 MHz,  $d_6$ -DMSO)

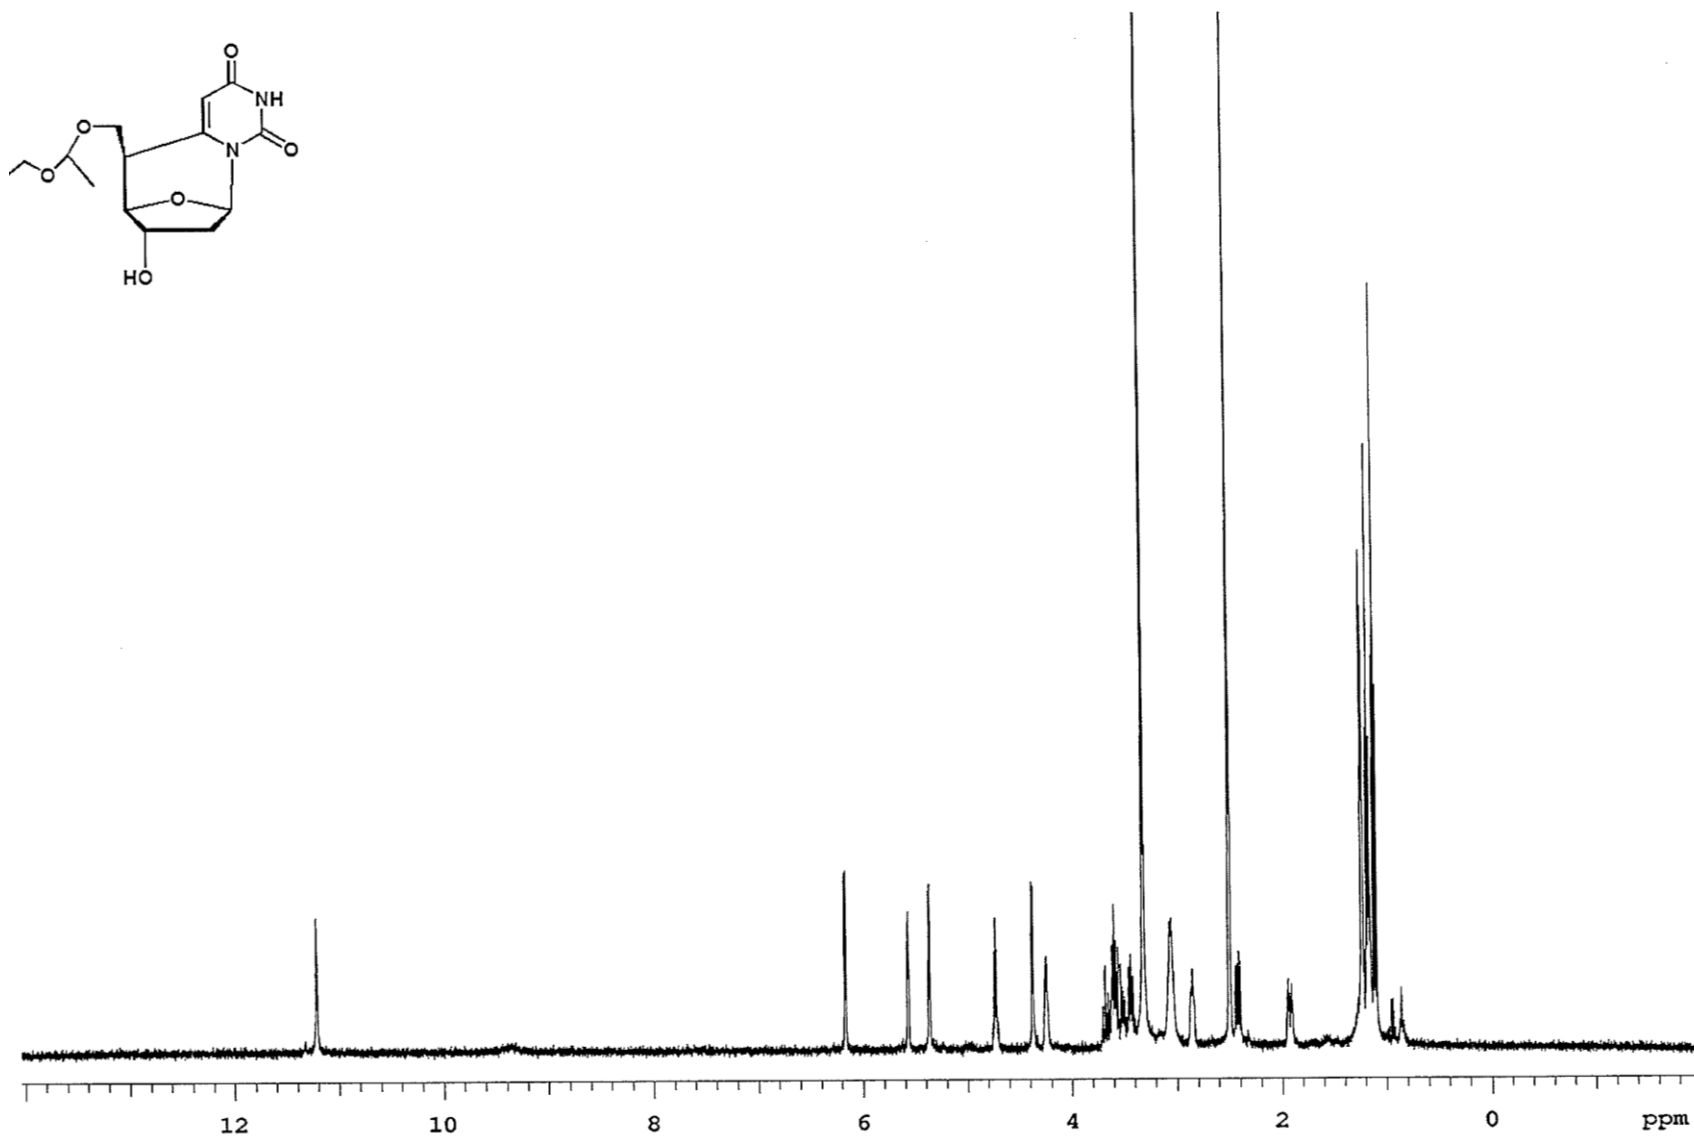

$^{13}\text{C}$  NMR of compound **12R** (100 MHz,  $d_6$ -DMSO)

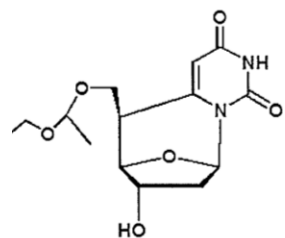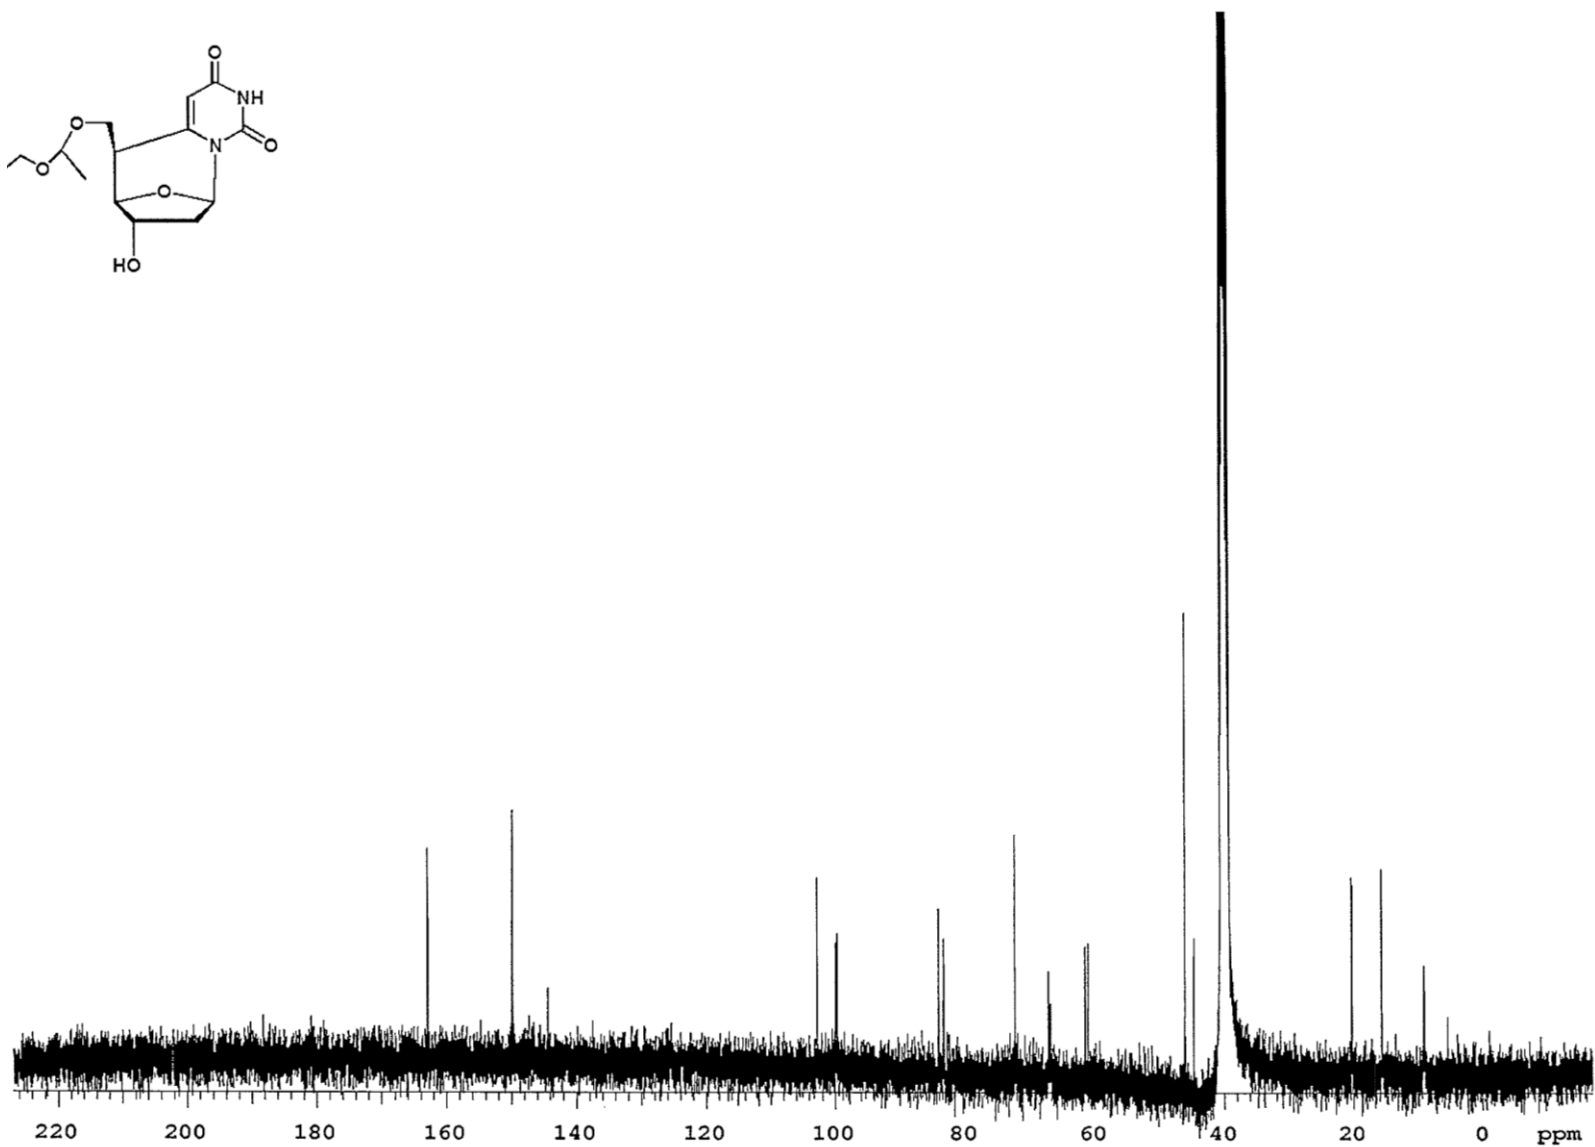

$^{31}\text{P}$  NMR of compound **13R** (200 MHz,  $\text{CDCl}_3$ )

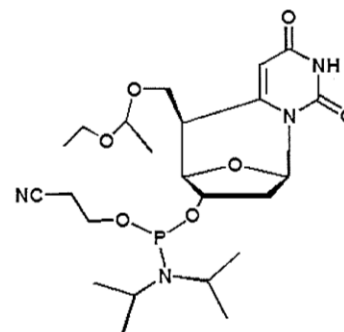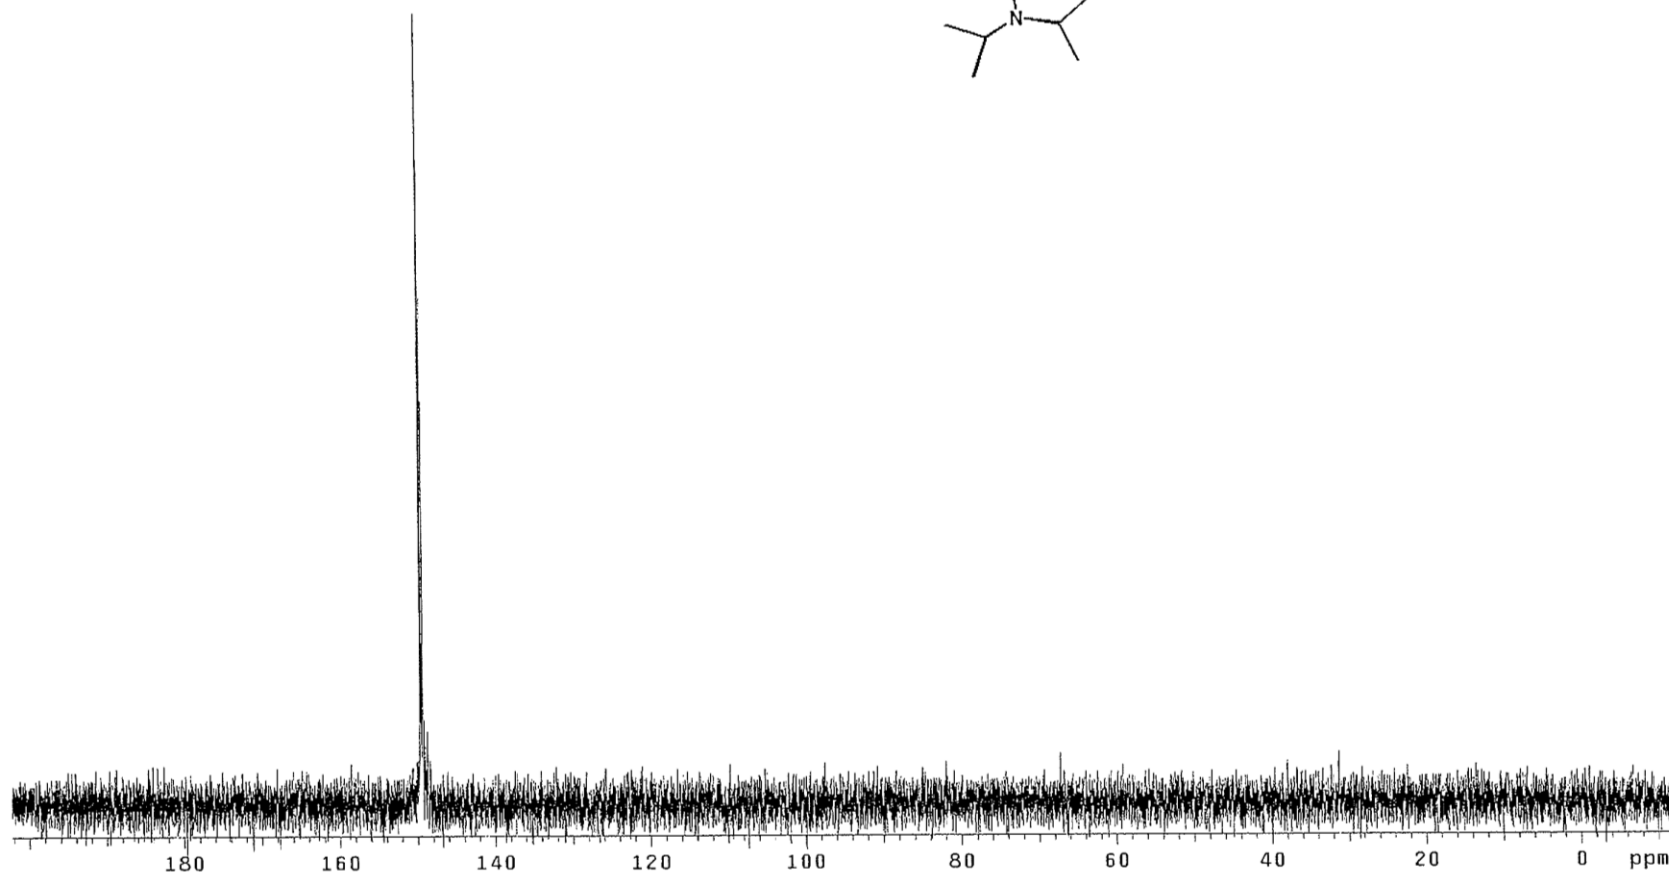

Supplement: c4ra04784b1.pdf [file c4ra04784b1.pdf]
